# Supplementary material for: Agreements between 24-2 and 24-2C Test Grids for Chloroquine/Hydroxychloroquine Retinopathy Patients and High-Risk Patients
Source: Research Square preprint supplement (doi:10.21203/rs.3.rs-6769459/v1), 2025-10-15
Supplement: Supplementary file 1 [file 5e79c6a3e5579afa7d524650.docx]

| SUPPLEMENTARY TABLE. Comparison of Visual Field Parameters Between Retinopathy and Non-Retinopathy Groups Using SITA Faster 24-2C and SITA Standard 24-2 | | | | | | | |
| --- | --- | --- | --- | --- | --- | --- | --- |
|  | Retinopathy (N=28) | | | Non-Retinopathy (N=47) | | | P-value†† |
| Median (IQR) | | P-value† | Median (IQR) | | P-value† |
| Mean deviation (dB) |  |  | 0.34 |  |  |  |  |
| - SITA faster 24-2C | -1.89 | (-3.65 to -0.76) | -0.97 | (-2.22 to -0.29) | 0.07 | 0.02* |
| - SITA standard 24-2 | -1.92 | (-3.61 to -0.61) | -0.96 | (-1.95 to 0.32) | 0.01* |
| Pattern standard deviation (dB) |  |  |  |  |  |  |  |
| - SITA faster 24-2C | 1.93 | (1.42-2.79) | 0.03* | 1.48 | (1.27-1.74) | 0.07 | 0.01* |
| - SITA standard 24-2 | 2.16 | (1.85-2.76) | 1.48 | (1.34-1.75) | <0.001* |
| Central mean sensitivity (dB) |  |  |  |  |  |  |  |
| - SITA faster 24-2C | 31.2 | (28.8-32.4) | 0.99 | 32.4 | (31.5-33.0) | 0.31 | 0.002* |
| - SITA standard 24-2 | 31.1 | (28.3-31.9) | 32.2 | (31.0-33.0) | 0.001* |
| The number of flagged pattern deviation points at P <1% in central 10 degree |  |  |  |  |  |  |  |
| - SITA faster 24-2C | 0 | (0-3) | 0.79 | 0 | (0-1) | 0.50 | 0.02* |
| - SITA standard 24-2 | 1 | (1-5) | 0 | (0-0) | <0.001* |
| The data was reported as median (IQR) for continuous variables.  † P-values obtained using Wilcoxon signed-rank test for comparing continuous data between SITA faster 24-2C and SITA standard 24-2  †† P-values obtained using Wilcoxon rank sum test for comparing continuous data between retinopathy and non-retinopathy groups  * Statistically significant P-value < .05 | | | | | | | |
